# Supplementary material
Source: Springer Nature journal article supplement (https://www.springermedizin.de/resource/supplementary/13058_2013_3552_MOESM14_ESM.pdf/9703940)

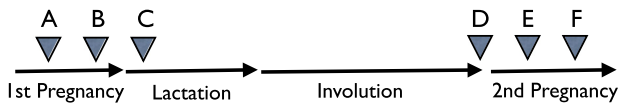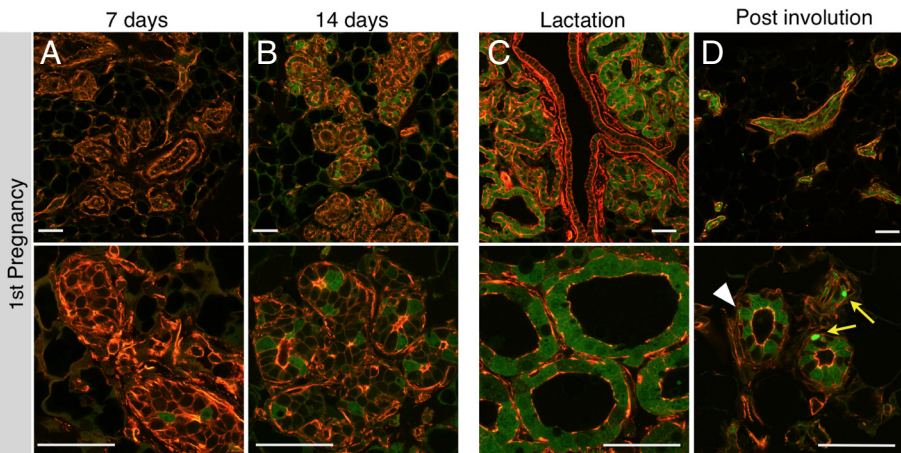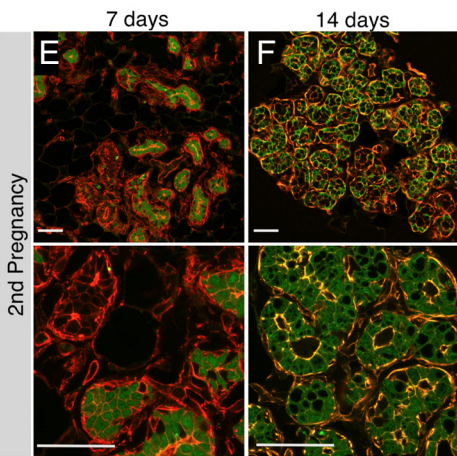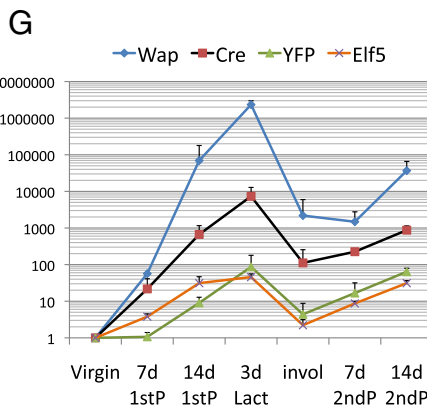

Supplement: MOESM14 [file 9703940]
